# Supplementary material for: Theoretical study on the anisotropic photo-induced carrier mobilities in layered double hydroxide-based photocatalysts
Source: Royal Society of Chemistry journal article supplement (doi:10.1039/d1ta05288h), 2021-01-01
Supplement: d1ta05288h1.pdf [file d1ta05288h1.pdf]

# Electronic Supplementary Information for Theoretical Study on the Anisotropic Photo-Induced Carrier Mobilities in Layered Double Hydroxides- Based Photocatalysts

Zi-Ru Chen,<sup>#a</sup> Yu-Quan Zhu,<sup>#a</sup> Si-Min Xu,<sup>\*ab</sup> Yufei Zhao,<sup>a</sup> Qian Peng,<sup>\*b</sup> and Hong  
Yan<sup>\*a</sup>

a State Key Laboratory of Chemical Resource Engineering, Beijing University of  
Chemical Technology, Beijing 100029, P. R. China

b State Key Laboratory of Elemento Organic Chemistry, College of Chemistry,  
Nankai University, Tianjin 300071, P. R. China

# Zi-Ru Chen and Yu-Quan Zhu contributed equally to this work

Corresponding Authors

[Si-MinXu@mail.buct.edu.cn](mailto:Si-MinXu@mail.buct.edu.cn), [Si-MinXu@nankai.edu.cn](mailto:Si-MinXu@nankai.edu.cn), [xsm713@sina.com](mailto:xsm713@sina.com) (S.-M.

Xu.),

[qpeng@nankai.edu.cn](mailto:qpeng@nankai.edu.cn) (Q. Peng),

[yanhong@mail.buct.edu.cn](mailto:yanhong@mail.buct.edu.cn) (H. Yan)

## Contents

| Item                    | Title                                                                                                                                                                      | Pagination |
|-------------------------|----------------------------------------------------------------------------------------------------------------------------------------------------------------------------|------------|
| Supplementary Fig. 1    | Schematic illustration of internal reorganization energy $\lambda$ in Marcus theory                                                                                        | 3          |
| Supplementary Fig. 2    | Relationship between transfer integral and interlayer distance in $Mg_2Al$ -Cl-LDH                                                                                         | 4          |
| Supplementary Fig. 3    | Optimized geometries of $M_2M'$ -LDHs cluster models                                                                                                                       | 5          |
| Supplementary Fig. 4    | Band structures of $Mg_2Cr$ -Cl-LDH, $Co_2Al$ -Cl-LDH, $Co_2Cr$ -Cl-LDH, $Ni_2Al$ -Cl-LDH, $Ni_2Cr$ -Cl-LDH, and $Zn_2Cr$ -Cl-LDH at the level of PBE                      | 6          |
| Supplementary Table 1   | Experimental and calculated (with and without van der Waals correction) lattice parameters for periodic models of $M_2M'$ -Cl-LDHs                                         | 7          |
| Supplementary Table 2   | Structural information for $Mg_2Al$ -Cl-LDH cluster models with different sizes                                                                                            | 8          |
| Supplementary Table 3   | Structural information for $M_2M'$ -LDHs cluster models                                                                                                                    | 9          |
| Supplementary Table 4   | Band gap energies, work functions, valence band maximum, and conduction band minimum for $M_2M'$ -Cl-LDHs under lattice dilation and compression in $x$ and $y$ directions | 10         |
| Supplementary Reference |                                                                                                                                                                            | 13         |

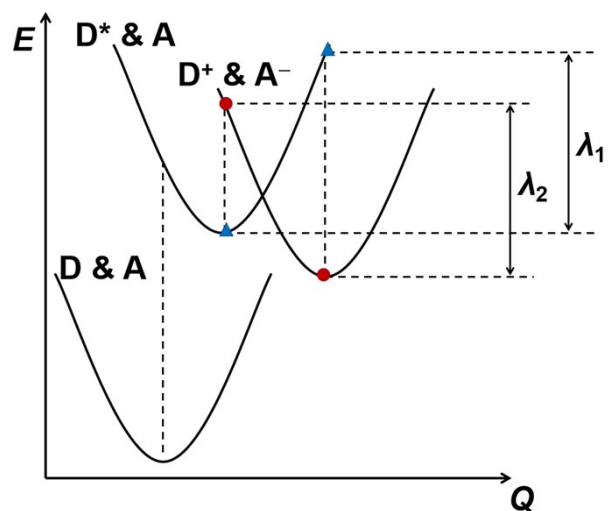

**Fig. S1.** Schematic illustration of the compositions of internal reorganization energy  $\lambda$  in Marcus theory. The curves represent the potential energy surfaces of D & A (D represents the donor in the ground state, A denotes the acceptor in the ground state), and  $D^+ & A^-$  ( $D^+$  represents the donor in the cationic state and  $A^-$  represents the acceptor in the anionic state),  $D^* & A$  ( $D^*$  represents the donor in the excited state), respectively.

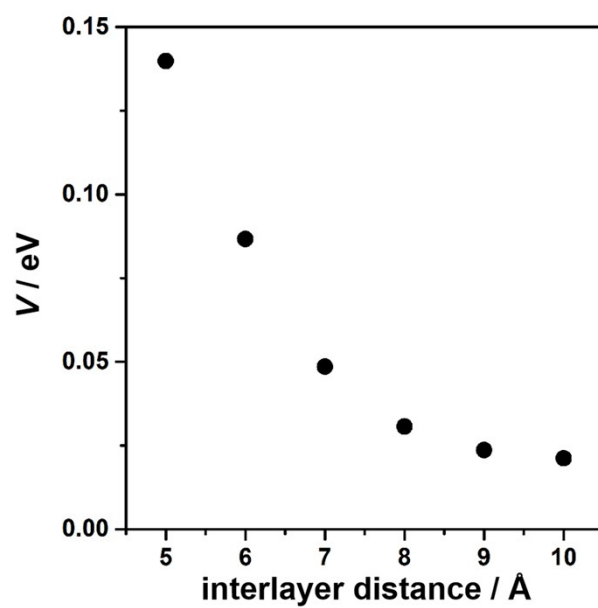

**Fig. S2.** Relationship between the transfer integral  $V$  and interlayer distance between two LDHs matrix in  $[\text{Mg}_2\text{Al}(\text{OH})_6(\text{OH}_2)_7]\cdot\text{Cl}$ .

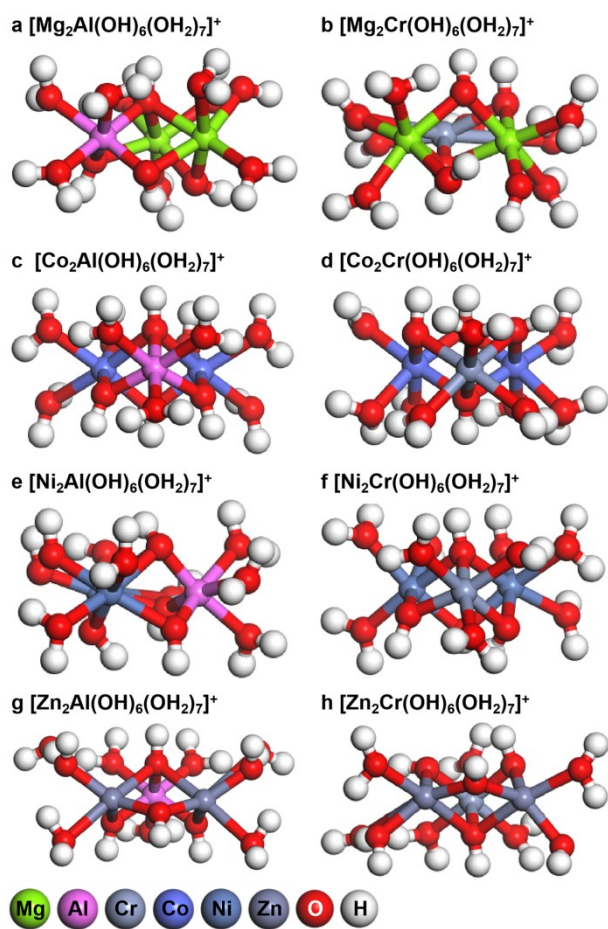

**Fig. S3.** Optimized geometries of (a)  $[\text{Mg}_2\text{Al}(\text{OH})_6(\text{OH}_2)_7]^+$ , (b)  $[\text{Mg}_2\text{Cr}(\text{OH})_6(\text{OH}_2)_7]^+$ , (c)  $[\text{Co}_2\text{Al}(\text{OH})_6(\text{OH}_2)_7]^+$ , (d)  $[\text{Co}_2\text{Cr}(\text{OH})_6(\text{OH}_2)_7]^+$ , (e)  $[\text{Ni}_2\text{Al}(\text{OH})_6(\text{OH}_2)_7]^+$ , (f)  $[\text{Ni}_2\text{Cr}(\text{OH})_6(\text{OH}_2)_7]^+$ , (g)  $[\text{Zn}_2\text{Al}(\text{OH})_6(\text{OH}_2)_7]^+$ , and (h)  $[\text{Zn}_2\text{Cr}(\text{OH})_6(\text{OH}_2)_7]^+$  cluster models. The color of each element is labeled.

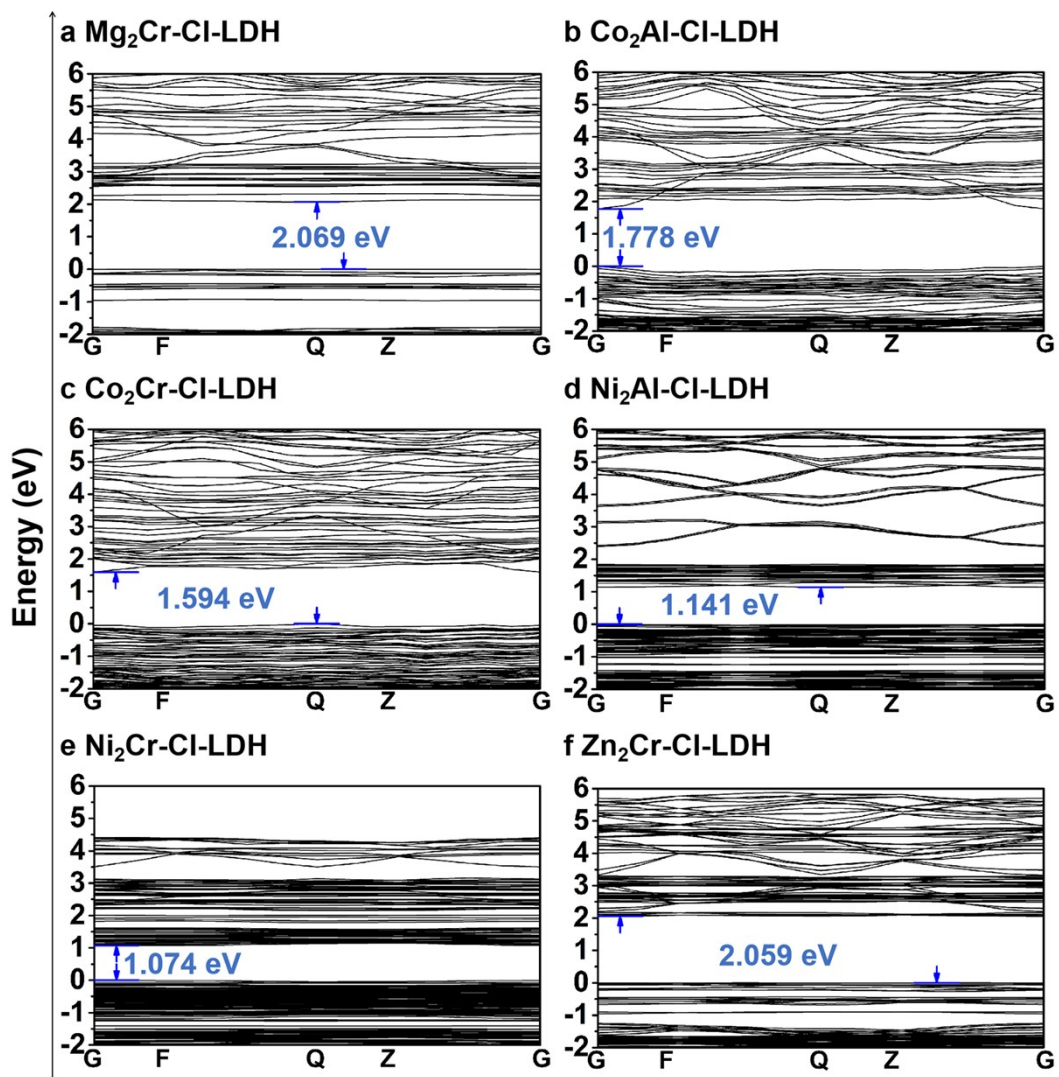

**Fig. S4.** Band Structures of (a)  $\text{Mg}_2\text{Cr-CI-LDH}$ , (b)  $\text{Co}_2\text{Al-CI-LDH}$ , (c)  $\text{Co}_2\text{Cr-CI-LDH}$ , (d)  $\text{Ni}_2\text{Al-CI-LDH}$ , (e)  $\text{Ni}_2\text{Cr-CI-LDH}$ , and (f)  $\text{Zn}_2\text{Cr-CI-LDH}$  at the level of PBE. The valence band maximums, conduction band minimums, and band gap energies are labeled.

**Table S1.** Experimental and Calculated (with and without van der Waals Correction) Lattice Parameters for Periodic Models of  $M_2M'$ -Cl-LDHs ( $M = \text{Mg, Co, Ni, and Zn}$ ;  $M' = \text{Al, and Cr}$ )

| model                     | lattice parameter ( $\text{\AA}$ ) |                       |                                  |      |                               |      |
|---------------------------|------------------------------------|-----------------------|----------------------------------|------|-------------------------------|------|
|                           | experimental                       |                       | calculated                       |      |                               |      |
|                           | $a = b$                            | $c$                   | without van der Waals correction |      | with van der Waals correction |      |
|                           |                                    |                       | $a = b$                          | $c$  | $a = b$                       | $c$  |
| Mg <sub>2</sub> Al-Cl-LDH | 3.04 <sup>[S1]</sup>               | 7.54 <sup>[S1]</sup>  | 3.08                             | 7.49 | 3.07                          | 7.38 |
| Mg <sub>2</sub> Cr-Cl-LDH | 3.01 <sup>[S2]</sup>               | 7.72 <sup>[S3]</sup>  | 3.10                             | 7.58 | 3.11                          | 7.50 |
| Co <sub>2</sub> Al-Cl-LDH | 3.07 <sup>[S4]</sup>               | 7.59 <sup>[S4]</sup>  | 3.07                             | 7.59 | 3.05                          | 7.52 |
| Co <sub>2</sub> Cr-Cl-LDH | 3.08 <sup>[S5]</sup>               | 7.86 <sup>[S6]</sup>  | 3.08                             | 7.73 | 3.08                          | 7.70 |
| Ni <sub>2</sub> Al-Cl-LDH | 3.01 <sup>[S7]</sup>               | 7.64 <sup>[S7]</sup>  | 3.03                             | 8.05 | 3.03                          | 7.78 |
| Ni <sub>2</sub> Cr-Cl-LDH | 3.08 <sup>[S8]</sup>               | 7.74 <sup>[S8]</sup>  | 3.07                             | 8.66 | 3.07                          | 8.28 |
| Zn <sub>2</sub> Al-Cl-LDH | 3.08 <sup>[S9]</sup>               | 7.80 <sup>[S9]</sup>  | 3.11                             | 7.81 | 3.10                          | 7.81 |
| Zn <sub>2</sub> Cr-Cl-LDH | 3.11 <sup>[S10]</sup>              | 7.71 <sup>[S10]</sup> | 3.15                             | 7.73 | 3.15                          | 7.72 |

**Table S2.** Structural Information for the Optimized Geometries of  
 $[\text{Mg}_2\text{Al}(\text{OH})_6(\text{OH}_2)_7]\cdot\text{Cl}$ ,  $[\text{Mg}_4\text{Al}_2(\text{OH})_{12}(\text{OH}_2)_{10}]\cdot 2\text{Cl}$ , and  
 $[\text{Mg}_6\text{Al}_3(\text{OH})_{18}(\text{OH}_2)_{12}]\cdot 3\text{Cl}$  Cluster Models

| model                                                                        | distance (Å) |       | bond length (Å) |       |
|------------------------------------------------------------------------------|--------------|-------|-----------------|-------|
|                                                                              | Mg-Mg        | Mg-Al | Mg-O            | Al-O  |
| $[\text{Mg}_2\text{Al}(\text{OH})_6(\text{OH}_2)_7]\cdot\text{Cl}$           | 3.073        | 3.015 | 2.294           | 1.920 |
| $[\text{Mg}_4\text{Al}_2(\text{OH})_{12}(\text{OH}_2)_{10}]\cdot 2\text{Cl}$ | 2.981        | 3.031 | 2.261           | 1.932 |
| $[\text{Mg}_6\text{Al}_3(\text{OH})_{18}(\text{OH}_2)_{12}]\cdot 3\text{Cl}$ | 3.152        | 3.092 | 2.157           | 1.932 |

  

| model                                                                        | bond angle (°) |        |        | dihedral angle (°) |
|------------------------------------------------------------------------------|----------------|--------|--------|--------------------|
|                                                                              | Mg-O-Mg        | O-Mg-O | O-Al-O | O-Al-O-Mg          |
| $[\text{Mg}_2\text{Al}(\text{OH})_6(\text{OH}_2)_7]\cdot\text{Cl}$           | 97.122         | 89.105 | 87.092 | 176.715            |
| $[\text{Mg}_4\text{Al}_2(\text{OH})_{12}(\text{OH}_2)_{10}]\cdot 2\text{Cl}$ | 92.938         | 76.663 | 87.286 | 173.455            |
| $[\text{Mg}_6\text{Al}_3(\text{OH})_{18}(\text{OH}_2)_{12}]\cdot 3\text{Cl}$ | 95.401         | 81.328 | 86.255 | 174.054            |



**Table S3.** Structural Information for the Optimized Geometries of[M<sub>2</sub>M'(OH)<sub>6</sub>(OH<sub>2</sub>)<sub>7</sub>]<sup>+</sup>·Cl Cluster Models (M = Mg, Co, Ni, and Zn; M' = Al, and Cr)

| model                                                                               | distance (Å) |        | bond length (Å)    |          |
|-------------------------------------------------------------------------------------|--------------|--------|--------------------|----------|
|                                                                                     | M-M          | M-M'   | M-O                | M'-O     |
| [Mg <sub>2</sub> Al(OH) <sub>6</sub> (OH <sub>2</sub> ) <sub>7</sub> ] <sup>+</sup> | 3.035        | 3.003  | 2.295              | 1.921    |
| [Mg <sub>2</sub> Cr(OH) <sub>6</sub> (OH <sub>2</sub> ) <sub>7</sub> ] <sup>+</sup> | 3.030        | 3.092  | 2.278              | 1.996    |
| [Co <sub>2</sub> Al(OH) <sub>6</sub> (OH <sub>2</sub> ) <sub>7</sub> ] <sup>+</sup> | 3.207        | 2.951  | 2.218              | 1.920    |
| [Co <sub>2</sub> Cr(OH) <sub>6</sub> (OH <sub>2</sub> ) <sub>7</sub> ] <sup>+</sup> | 3.156        | 3.140  | 2.300              | 1.988    |
| [Ni <sub>2</sub> Al(OH) <sub>6</sub> (OH <sub>2</sub> ) <sub>7</sub> ] <sup>+</sup> | 2.857        | 3.255  | 2.410              | 1.936    |
| [Ni <sub>2</sub> Cr(OH) <sub>6</sub> (OH <sub>2</sub> ) <sub>7</sub> ] <sup>+</sup> | 3.027        | 3.022  | 2.255              | 1.996    |
| [Zn <sub>2</sub> Al(OH) <sub>6</sub> (OH <sub>2</sub> ) <sub>7</sub> ] <sup>+</sup> | 3.126        | 3.051  | 2.325              | 1.921    |
| [Zn <sub>2</sub> Cr(OH) <sub>6</sub> (OH <sub>2</sub> ) <sub>7</sub> ] <sup>+</sup> | 3.081        | 3.098  | 2.283              | 1.994    |
| model                                                                               | angle (°)    |        | dihedral angle (°) |          |
|                                                                                     | M-O-M        | O-M-O  | O-M'-O             | O-M'-O-M |
| [Mg <sub>2</sub> Al(OH) <sub>6</sub> (OH <sub>2</sub> ) <sub>7</sub> ] <sup>+</sup> | 95.227       | 85.852 | 87.265             | 175.627  |
| [Mg <sub>2</sub> Cr(OH) <sub>6</sub> (OH <sub>2</sub> ) <sub>7</sub> ] <sup>+</sup> | 95.741       | 75.209 | 85.209             | 176.489  |
| [Co <sub>2</sub> Al(OH) <sub>6</sub> (OH <sub>2</sub> ) <sub>7</sub> ] <sup>+</sup> | 99.012       | 83.343 | 88.172             | 172.560  |
| [Co <sub>2</sub> Cr(OH) <sub>6</sub> (OH <sub>2</sub> ) <sub>7</sub> ] <sup>+</sup> | 99.116       | 80.819 | 86.238             | 176.947  |
| [Ni <sub>2</sub> Al(OH) <sub>6</sub> (OH <sub>2</sub> ) <sub>7</sub> ] <sup>+</sup> | 72.844       | 67.444 | 90.543             | 147.219  |
| [Ni <sub>2</sub> Cr(OH) <sub>6</sub> (OH <sub>2</sub> ) <sub>7</sub> ] <sup>+</sup> | 97.661       | 82.916 | 86.724             | 170.754  |
| [Zn <sub>2</sub> Al(OH) <sub>6</sub> (OH <sub>2</sub> ) <sub>7</sub> ] <sup>+</sup> | 96.993       | 74.797 | 86.561             | 175.534  |
| [Zn <sub>2</sub> Cr(OH) <sub>6</sub> (OH <sub>2</sub> ) <sub>7</sub> ] <sup>+</sup> | 97.460       | 76.706 | 87.480             | 176.029  |

**Table S4.** Band Gap Energies ( $E_g$ ), Work Functions ( $W$ ), Valence Band Maximum ( $E_{VBM}$ ), and Conduction Band Minimum ( $E_{CBM}$ ) for  $M_2M'$ -Cl-LDHs ( $M = \text{Mg, Co, Ni, and Zn}$ ;  $M' = \text{Al, and Cr}$ ) under Lattice Dilation and Compression in  $x$  and  $y$

| Directions                |           |                  |            |          |                       |                       |
|---------------------------|-----------|------------------|------------|----------|-----------------------|-----------------------|
| model                     | direction | $\Delta l / l_0$ | $E_g$ (eV) | $W$ (eV) | $E_{VBM} / \text{eV}$ | $E_{CBM} / \text{eV}$ |
| Mg <sub>2</sub> Al-Cl-LDH | x         | -1%              | 4.357      | 4.847    | -5.305                | -0.973                |
|                           |           | -0.5%            | 4.344      | 4.853    | -5.248                | -0.904                |
|                           |           | 0%               | 4.333      | 4.860    | -5.100                | -0.812                |
|                           |           | 0.5%             | 4.332      | 4.500    | -5.020                | -0.738                |
|                           |           | 1%               | 4.319      | 4.871    | -4.970                | -0.651                |
|                           | y         | -1%              | 4.353      | 4.662    | -5.255                | -0.641                |
|                           |           | -0.5%            | 4.338      | 4.610    | -5.238                | -0.686                |
|                           |           | 0%               | 4.311      | 4.699    | -5.207                | -0.697                |
|                           |           | 0.5%             | 4.293      | 4.661    | -5.389                | -0.715                |
|                           |           | 1%               | 4.274      | 4.634    | -5.371                | -0.744                |
| Mg <sub>2</sub> Cr-Cl-LDH | x         | -1%              | 2.867      | 4.237    | -6.383                | -3.504                |
|                           |           | -0.5%            | 2.836      | 4.365    | -6.351                | -3.547                |
|                           |           | 0%               | 2.824      | 4.259    | -6.270                | -3.581                |
|                           |           | 0.5%             | 2.768      | 4.232    | -6.246                | -3.618                |
|                           |           | 1%               | 2.742      | 4.229    | -6.200                | -3.647                |
|                           | y         | -1%              | 2.819      | 4.230    | -6.285                | -3.521                |
|                           |           | -0.5%            | 2.806      | 4.282    | -6.260                | -3.542                |
|                           |           | 0%               | 2.803      | 4.259    | -6.241                | -3.549                |
|                           |           | 0.5%             | 2.791      | 4.245    | -6.239                | -3.558                |
|                           |           | 1%               | 2.775      | 4.230    | -6.218                | -3.579                |
| Co <sub>2</sub> Al-Cl-LDH | x         | -1%              | 2.626      | 5.547    | -6.860                | -4.234                |
|                           |           | -0.5%            | 2.581      | 5.563    | -6.854                | -4.272                |
|                           |           | 0%               | 2.651      | 5.580    | -6.906                | -4.254                |
|                           |           | 0.5%             | 2.584      | 5.608    | -6.900                | -4.316                |
|                           |           | 1%               | 2.650      | 5.623    | -6.948                | -4.298                |
|                           | y         | -1%              | 2.615      | 5.449    | -6.757                | -4.141                |
|                           |           | -0.5%            | 2.632      | 5.494    | -6.810                | -4.178                |
|                           |           | 0%               | 2.651      | 5.580    | -6.906                | -4.254                |
|                           |           | 0.5%             | 2.644      | 5.634    | -6.956                | -4.312                |
|                           |           | 1%               | 2.651      | 5.690    | -7.015                | -4.365                |
| Co <sub>2</sub> Cr-Cl-LDH | x         | -1%              | 2.239      | 4.369    | -7.937                | -5.581                |
|                           |           | -0.5%            | 2.254      | 4.312    | -7.969                | -5.549                |
|                           |           | 0%               | 2.269      | 4.416    | -7.989                | -5.502                |
|                           |           | 0.5%             | 2.279      | 4.297    | -8.002                | -5.485                |
|                           |           | 1%               | 2.301      | 4.352    | -8.051                | -5.458                |

|                           |          |       |       |       |        |        |
|---------------------------|----------|-------|-------|-------|--------|--------|
|                           |          | -1%   | 2.237 | 4.619 | -7.938 | -5.501 |
|                           |          | -0.5% | 2.242 | 4.687 | -7.954 | -5.512 |
|                           | <i>y</i> | 0%    | 2.251 | 4.628 | -7.986 | -5.530 |
|                           |          | 0.5%  | 2.297 | 4.658 | -8.008 | -5.544 |
|                           |          | 1%    | 2.292 | 4.680 | -8.026 | -5.566 |
|                           |          | -1%   | 2.565 | 4.671 | -5.953 | -3.389 |
|                           |          | -0.5% | 2.567 | 4.647 | -5.937 | -3.364 |
|                           | <i>x</i> | 0%    | 2.588 | 4.629 | -5.930 | -3.343 |
|                           |          | 0.5%  | 2.594 | 4.640 | -5.923 | -3.335 |
|                           |          | 1%    | 2.597 | 4.602 | -5.901 | -3.303 |
| Ni <sub>2</sub> Al-Cl-LDH |          | -1%   | 2.294 | 4.672 | -5.819 | -3.525 |
|                           |          | -0.5% | 2.322 | 4.609 | -5.806 | -3.468 |
|                           | <i>y</i> | 0%    | 2.338 | 4.637 | -5.800 | -3.448 |
|                           |          | 0.5%  | 2.355 | 4.622 | -5.770 | -3.404 |
|                           |          | 1%    | 2.371 | 4.562 | -5.748 | -3.377 |
|                           |          | -1%   | 2.079 | 4.843 | -5.883 | -3.803 |
|                           |          | -0.5% | 2.094 | 4.793 | -5.840 | -3.746 |
|                           | <i>x</i> | 0%    | 2.163 | 4.720 | -5.802 | -3.638 |
|                           |          | 0.5%  | 2.146 | 4.696 | -5.769 | -3.623 |
|                           |          | 1%    | 2.092 | 4.669 | -5.715 | -3.623 |
| Ni <sub>2</sub> Cr-Cl-LDH |          | -1%   | 2.115 | 4.550 | -5.608 | -3.492 |
|                           |          | -0.5% | 2.059 | 4.633 | -5.663 | -3.603 |
|                           | <i>y</i> | 0%    | 2.163 | 4.720 | -5.802 | -3.638 |
|                           |          | 0.5%  | 2.085 | 4.774 | -5.816 | -3.732 |
|                           |          | 1%    | 2.110 | 4.824 | -5.879 | -3.769 |
|                           |          | -1%   | 3.401 | 4.854 | -5.961 | -2.453 |
|                           |          | -0.5% | 3.405 | 4.848 | -5.955 | -2.445 |
|                           | <i>x</i> | 0%    | 3.417 | 4.852 | -5.951 | -2.444 |
|                           |          | 0.5%  | 3.408 | 4.838 | -5.942 | -2.434 |
|                           |          | 1%    | 3.411 | 4.829 | -5.935 | -2.424 |
| Zn <sub>2</sub> Al-Cl-LDH |          | -1%   | 3.382 | 4.848 | -5.942 | -2.458 |
|                           |          | -0.5% | 3.384 | 4.850 | -5.939 | -2.457 |
|                           | <i>y</i> | 0%    | 3.389 | 4.841 | -5.936 | -2.446 |
|                           |          | 0.5%  | 3.391 | 4.835 | -5.930 | -2.440 |
|                           |          | 1%    | 3.388 | 4.833 | -5.927 | -2.439 |
|                           |          | -1%   | 2.466 | 5.031 | -6.264 | -3.798 |
|                           |          | -0.5% | 2.459 | 5.055 | -6.285 | -3.825 |
|                           | <i>x</i> | 0%    | 2.478 | 5.065 | -6.304 | -3.826 |
|                           |          | 0.5%  | 2.424 | 5.074 | -6.286 | -3.862 |
|                           |          | 1%    | 2.409 | 5.077 | -6.282 | -3.872 |
| Zn <sub>2</sub> Cr-Cl-LDH |          | -1%   | 2.495 | 4.868 | -6.116 | -3.620 |
|                           |          | -0.5% | 2.497 | 4.957 | -6.205 | -3.709 |
|                           | <i>y</i> | 0%    | 2.478 | 5.065 | -6.304 | -3.826 |
|                           |          | 0.5%  | 2.436 | 5.152 | -6.370 | -3.934 |

---

|    |       |       |        |        |
|----|-------|-------|--------|--------|
| 1% | 2.390 | 5.215 | -6.410 | -4.020 |
|----|-------|-------|--------|--------|

---

## References

- (S1) L. Sun and W. Tang, Preparation of Layered Double Hydroxides Nanomaterials via the Anionic Surfactant, *Appl. Mech. Mater.*, 2012, **155–156**, 907–911.
- (S2) K. Maeda and K. Domen, Photocatalytic Water Splitting: Recent Progress and Future Challenges, *J. Phys. Chem. Lett.*, 2010, **1**, 2655–2661.
- (S3) I. M. Ahmed, Mg-Cr Layered Double Hydroxide (LDH) Intercalated with Sodium Dodecyl Sulfate as Sorbent for Alizarine Red-S in Aqueous Solutions, *Arab J. Nucl. Sci. Appl.*, 2021, **54**, 50–62.
- (S4) B. Grégoire, C. Ruby and C. Carteret, Structural Cohesion of M<sup>II</sup>-M<sup>III</sup> Layered Double Hydroxides Crystals: Electrostatic Forces and Cationic Polarizing Power, *Cryst. Growth Des.*, 2012, **12**, 4324–4333.
- (S5) H. Pourradi, K. Ghani and M. Mahdavi, Fully Ambient Air Processed Perovskite Solar Cell Based on Co(Co,Cr)<sub>2</sub>O<sub>4</sub>/TiO<sub>2</sub> P-N Heterojunction Array in Photoanode, *J. Phys. Chem. C*, 2019, **123**, 4044–4055.
- (S6) F. Cavani, F. Trifiro and A. Vaccari, Hydrotalcite-Type Anionic Clays: Preparation, Properties and Applications, *Catal. Today*, 1991, **11**, 173–301.
- (S7) M. E. Pérez-Bernal, R. J. Ruano-Casero, F. Benito and V. Rives, Nickel-Aluminum Layered Double Hydroxides Prepared via Inverse Micelles Formation, *J. Solid State Chem.*, 2009, **182**, 1593–1601.
- (S8) O. Clause, M. Gazzano, F. Trifiro', A. Vaccari and L. Zatorski, Preparation and Thermal Reactivity of Nickel/Chromium and Nickel/Aluminium Hydrotalcite-Type Precursors, *Appl. Catal.*, 1991, **73**, 217–236.

- (S9) S. Vial, C. Forano, D. Shan, C. Mousty, H. Barhoumi, C. Martelet and N. Jaffrezic, Nanohybrid-Layered Double Hydroxides/Urease Materials: Synthesis and Application to Urea Biosensors, *Mater. Sci. Eng. C*, 2006, **26**, 387–393.
- (S10) L. E. Mersly, E. Mountassir, E. M. Moujahid, C. Forano, M. E. Haddad, S. Briche, A. A. Tahiri and S. Rafqah, ZnCr-LDHs with Dual Adsorption and Photocatalysis Capability for the Removal of Acid Orange 7 Dye in Aqueous Solution, *J. Sci-Adv. Mater. Dev.*, 2021, **6**, 118–126.
